# Supplementary material for: Quercetin Exerts Age-Dependent Beneficial Effects on Blood Pressure and Vascular Function, But Is Inefficient in Preventing Myocardial Ischemia-Reperfusion Injury in Zucker Diabetic Fatty Rats
Source: MDPI journal article supplement (doi:10.3390/molecules25010187), 2020-01-02
Supplement: s1 [file s1]

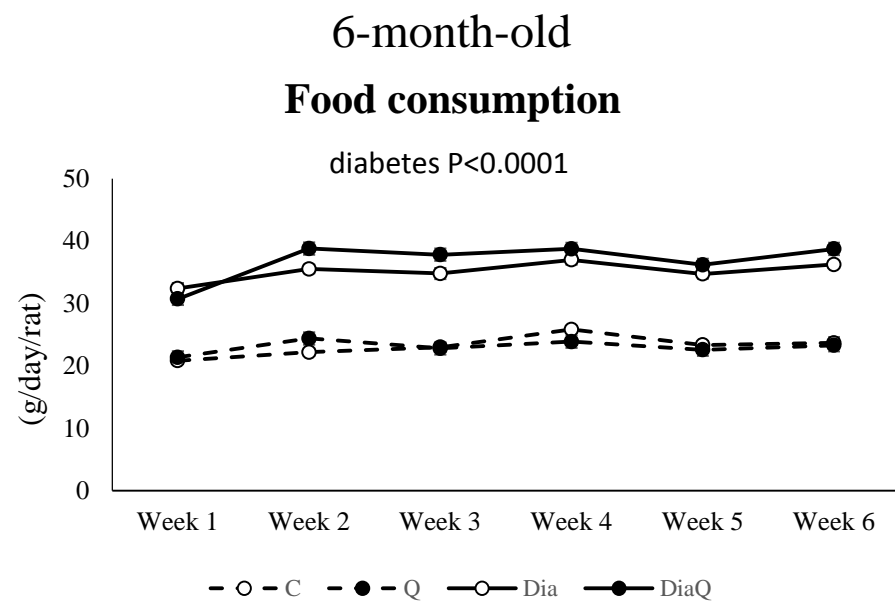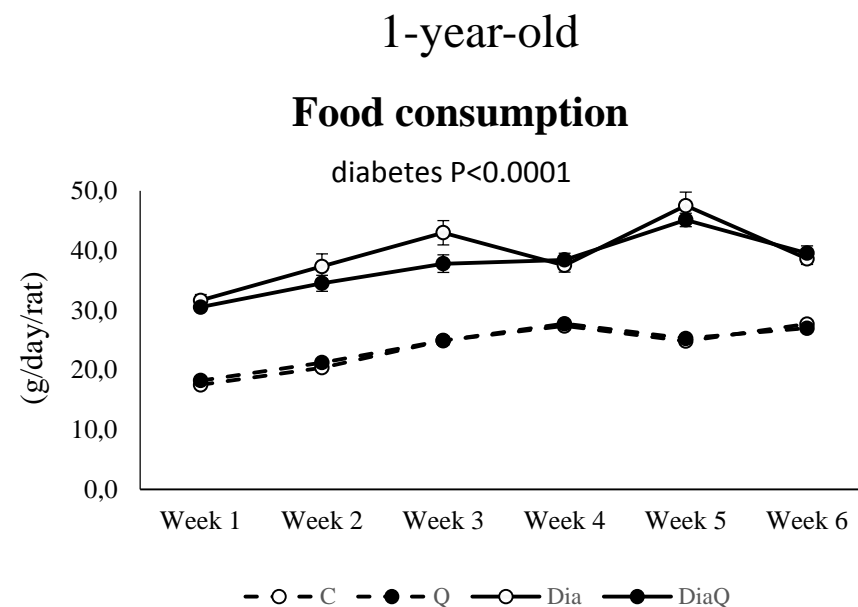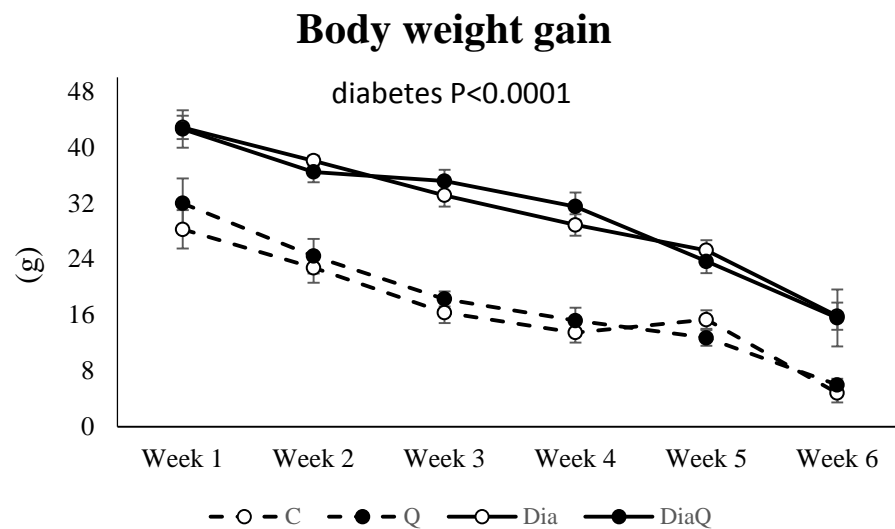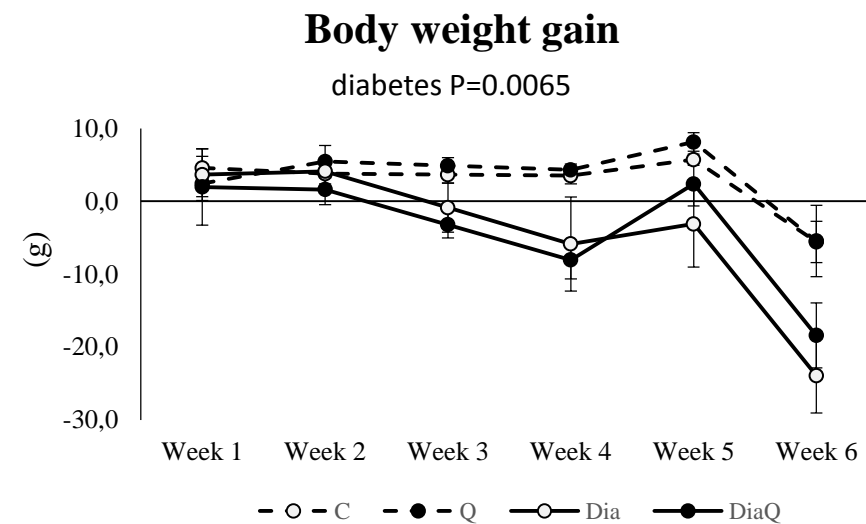

**Supplementary Figure.** Average daily food consumption by weeks (upper graphs), and weekly body weight gain (lower graphs) in ZDF rats treated with quercetin. Results are expressed as mean  $\pm$  SEM. Significant differences were evaluated by two-way ANOVA for main factors diabetes and quercetin treatment (significancies are shown for average daily food consumption (upper) and total body weight gain (lower) ).
